# Supplementary material
Source: publisher figshare collection journal article supplement (https://brill.figshare.com/articles/dataset/_/28596227)
Supplement: Supplementary file 1 [file 1]

TABLE S1 Characteristics of the participants included in this study

| Participant type | Participant identity | Gender | Age |
| --- | --- | --- | --- |
| Methane excretors (*n*=3) | M1 | Female | 24 |
| M2 | Male | 32 |
| M3 | Male | 25 |
| Non-methane excretors (*n*=3) | N1 | Female | 24 |
| N2 | Female | 25 |
| N3 | Male | 29 |
